# Supplementary material
Source: PubMed Central journal article supplement (PMC2234099)

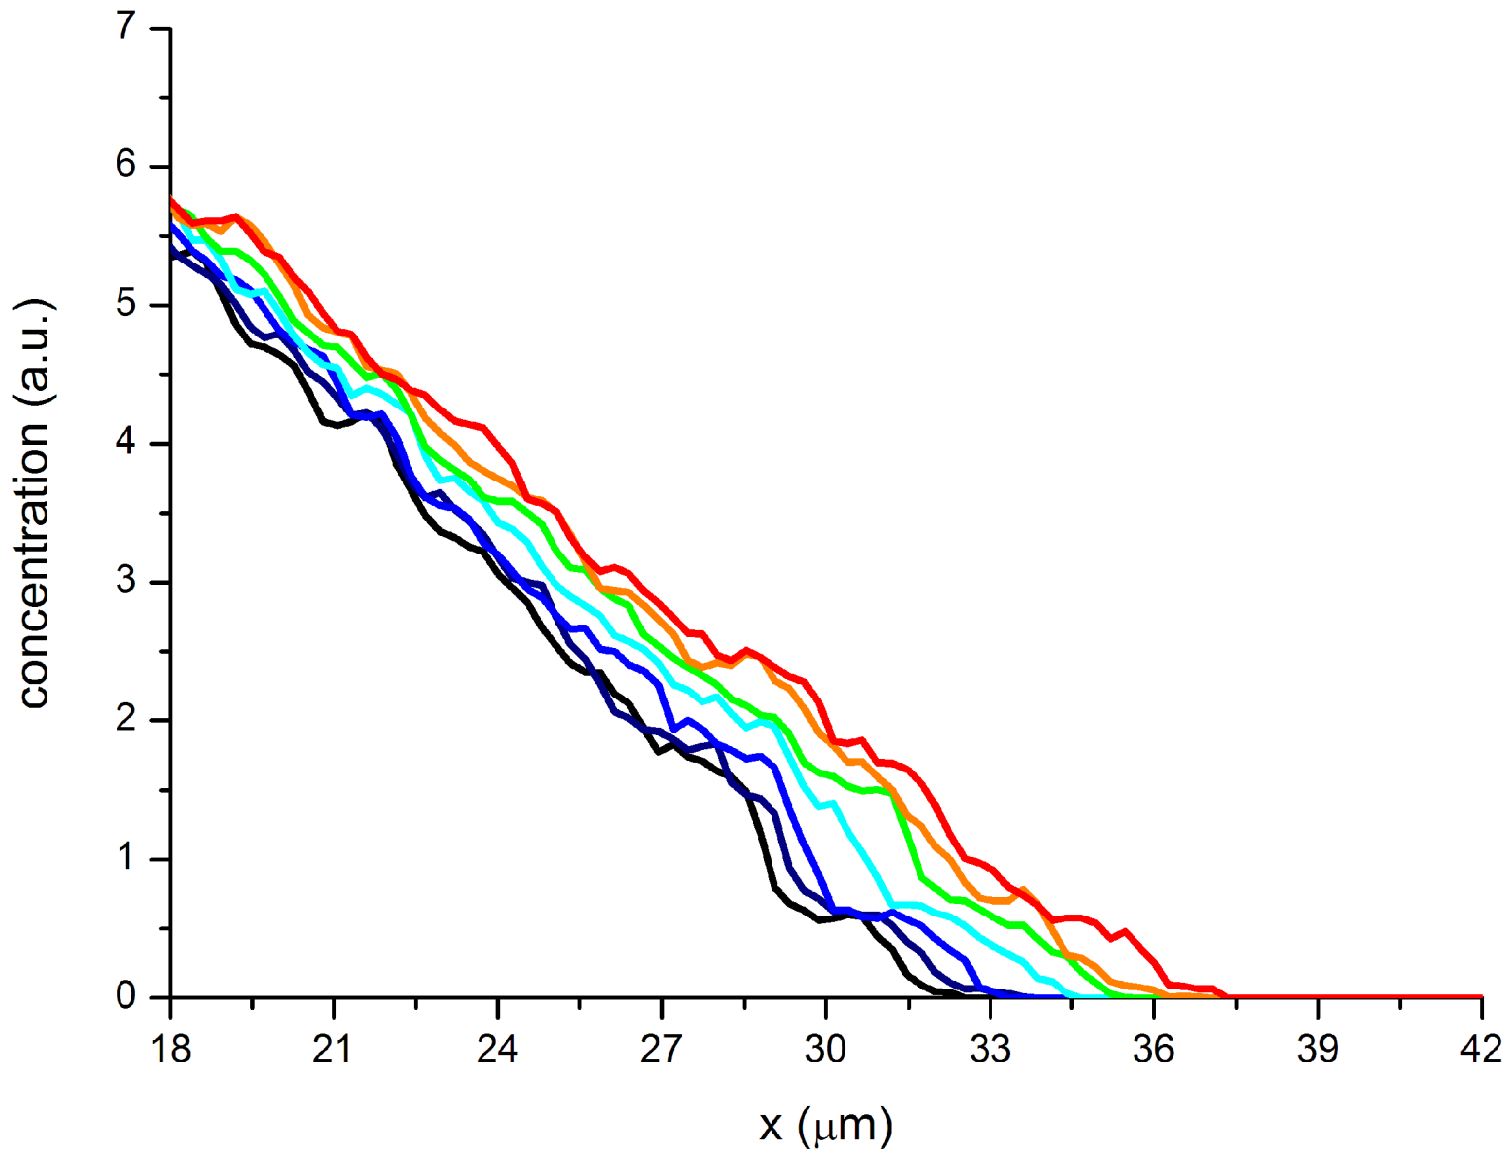

Supplement: pnas_0711319105_1.pdf [file pnas_0711319105_1.pdf]

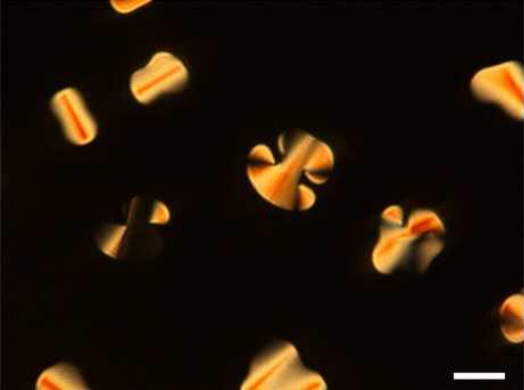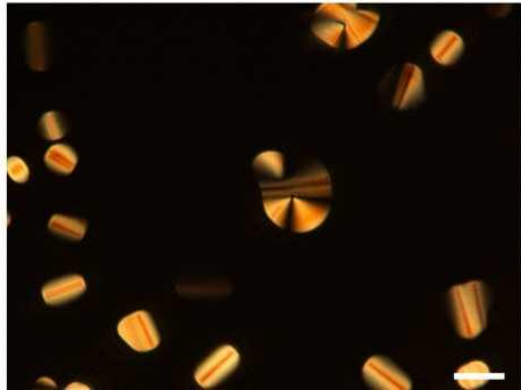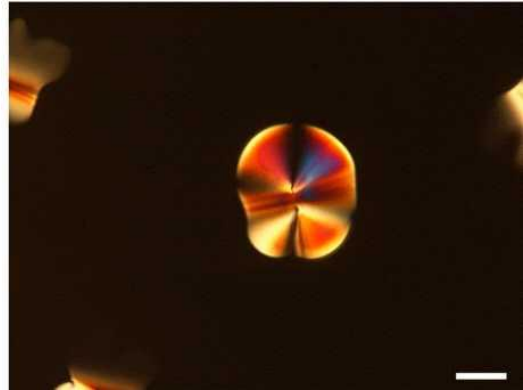

Supplement: pnas_0711319105_10.pdf [file pnas_0711319105_10.pdf]

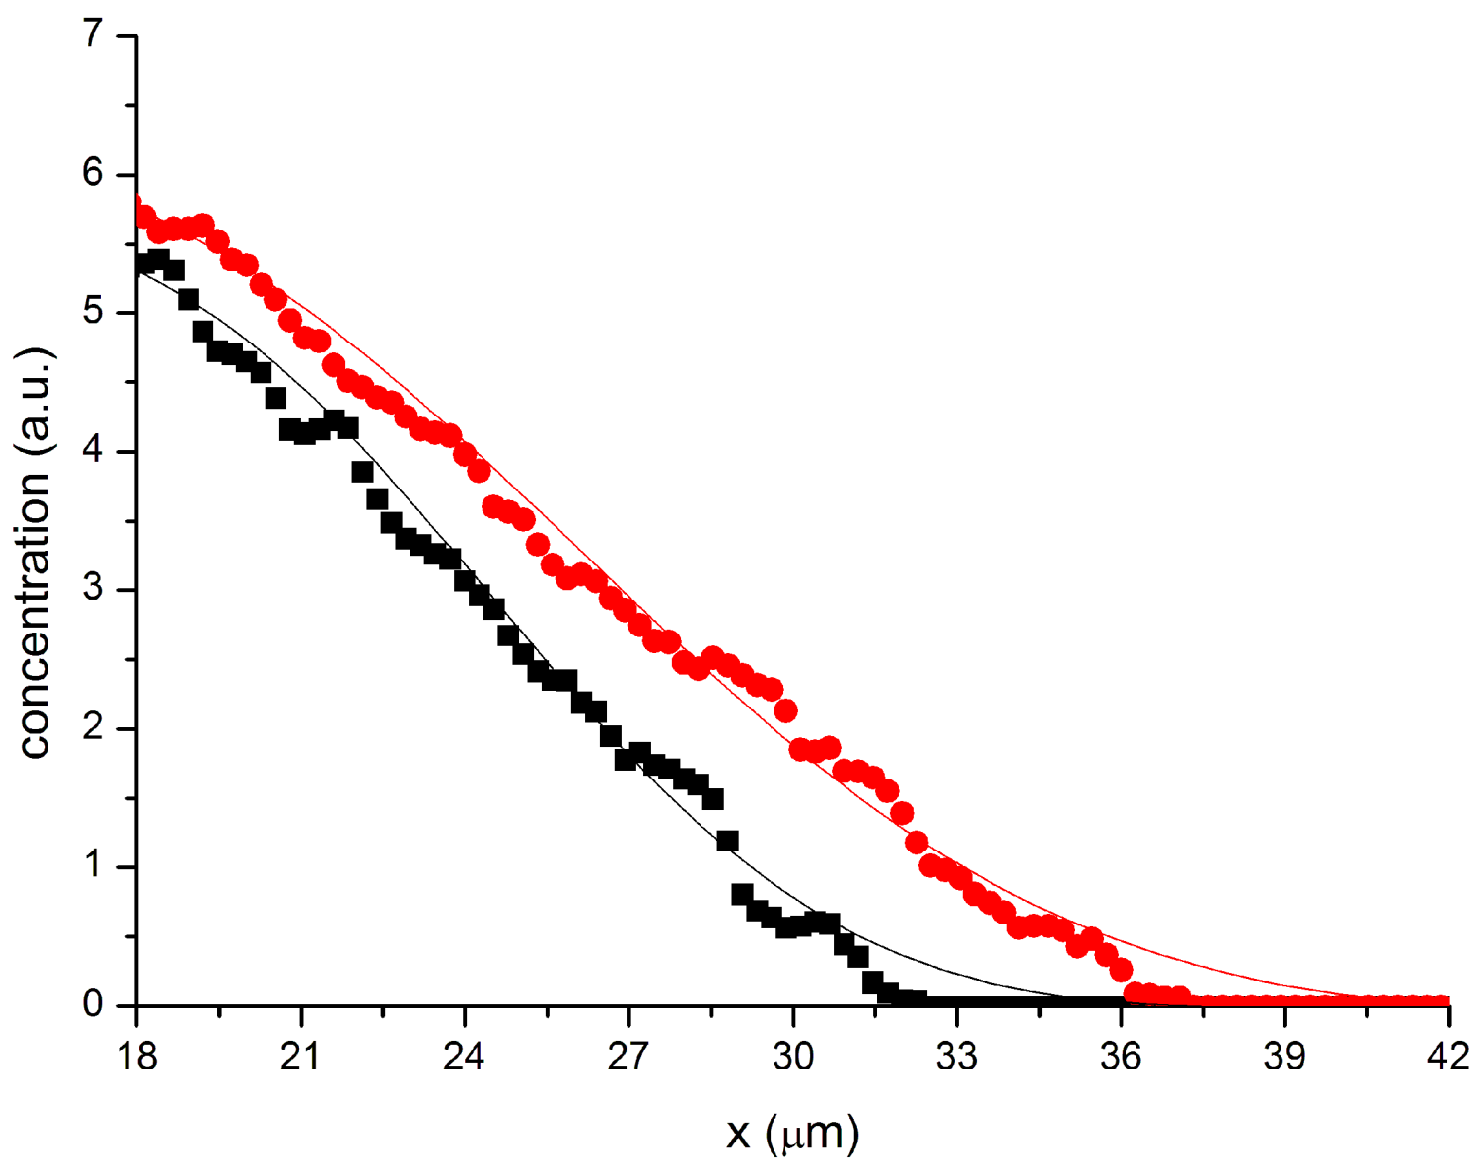

Supplement: pnas_0711319105_2.pdf [file pnas_0711319105_2.pdf]

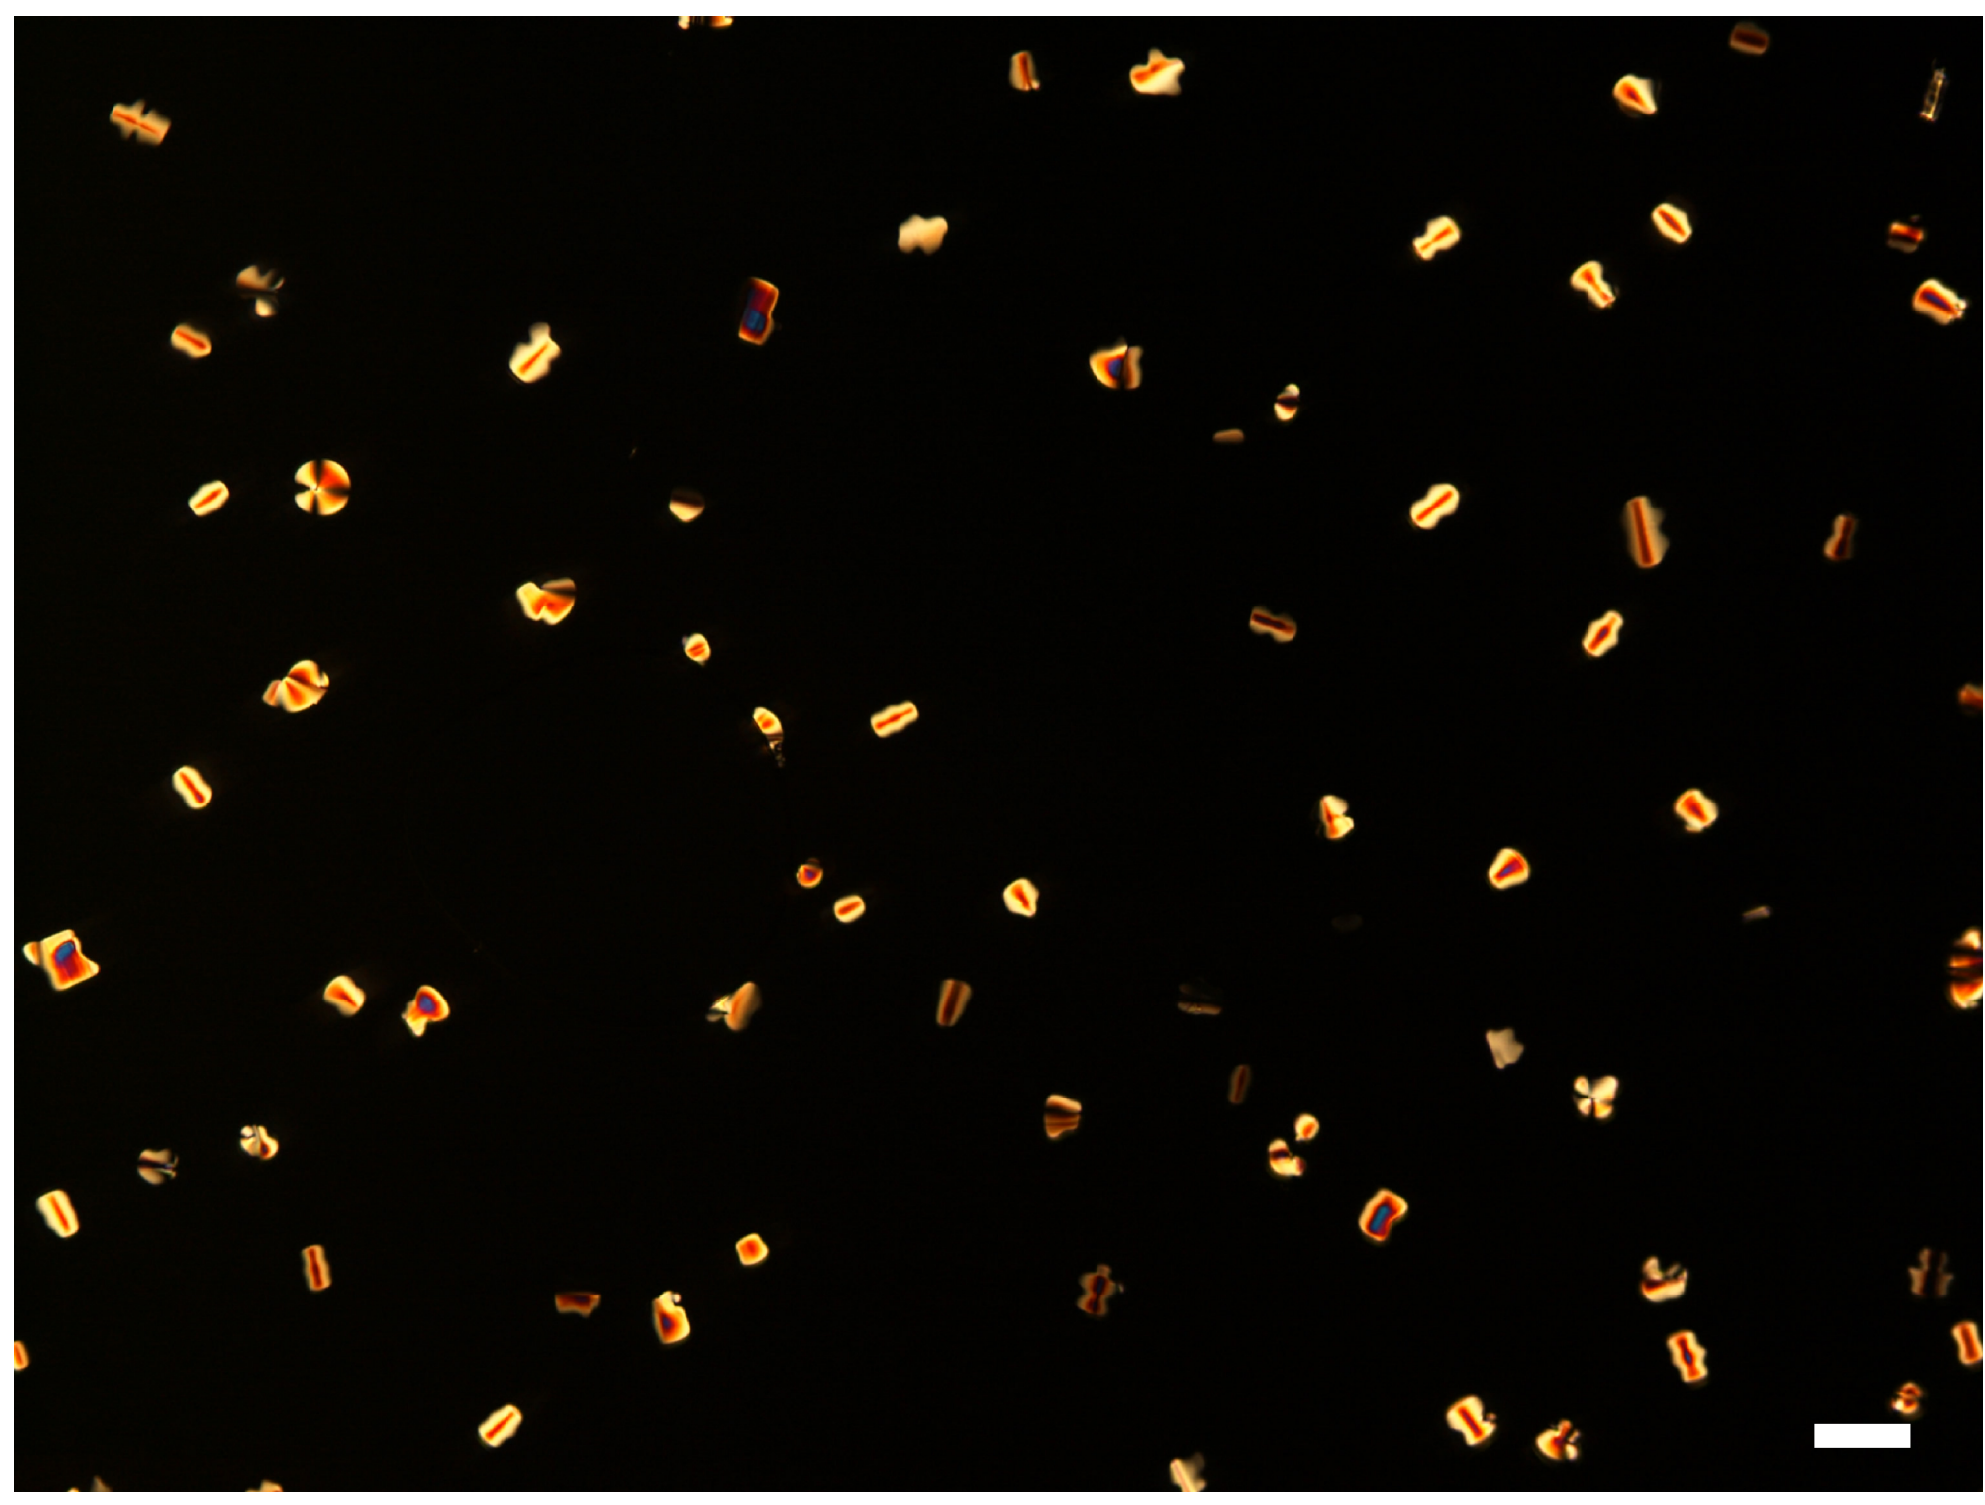

Supplement: pnas_0711319105_3.pdf [file pnas_0711319105_3.pdf]

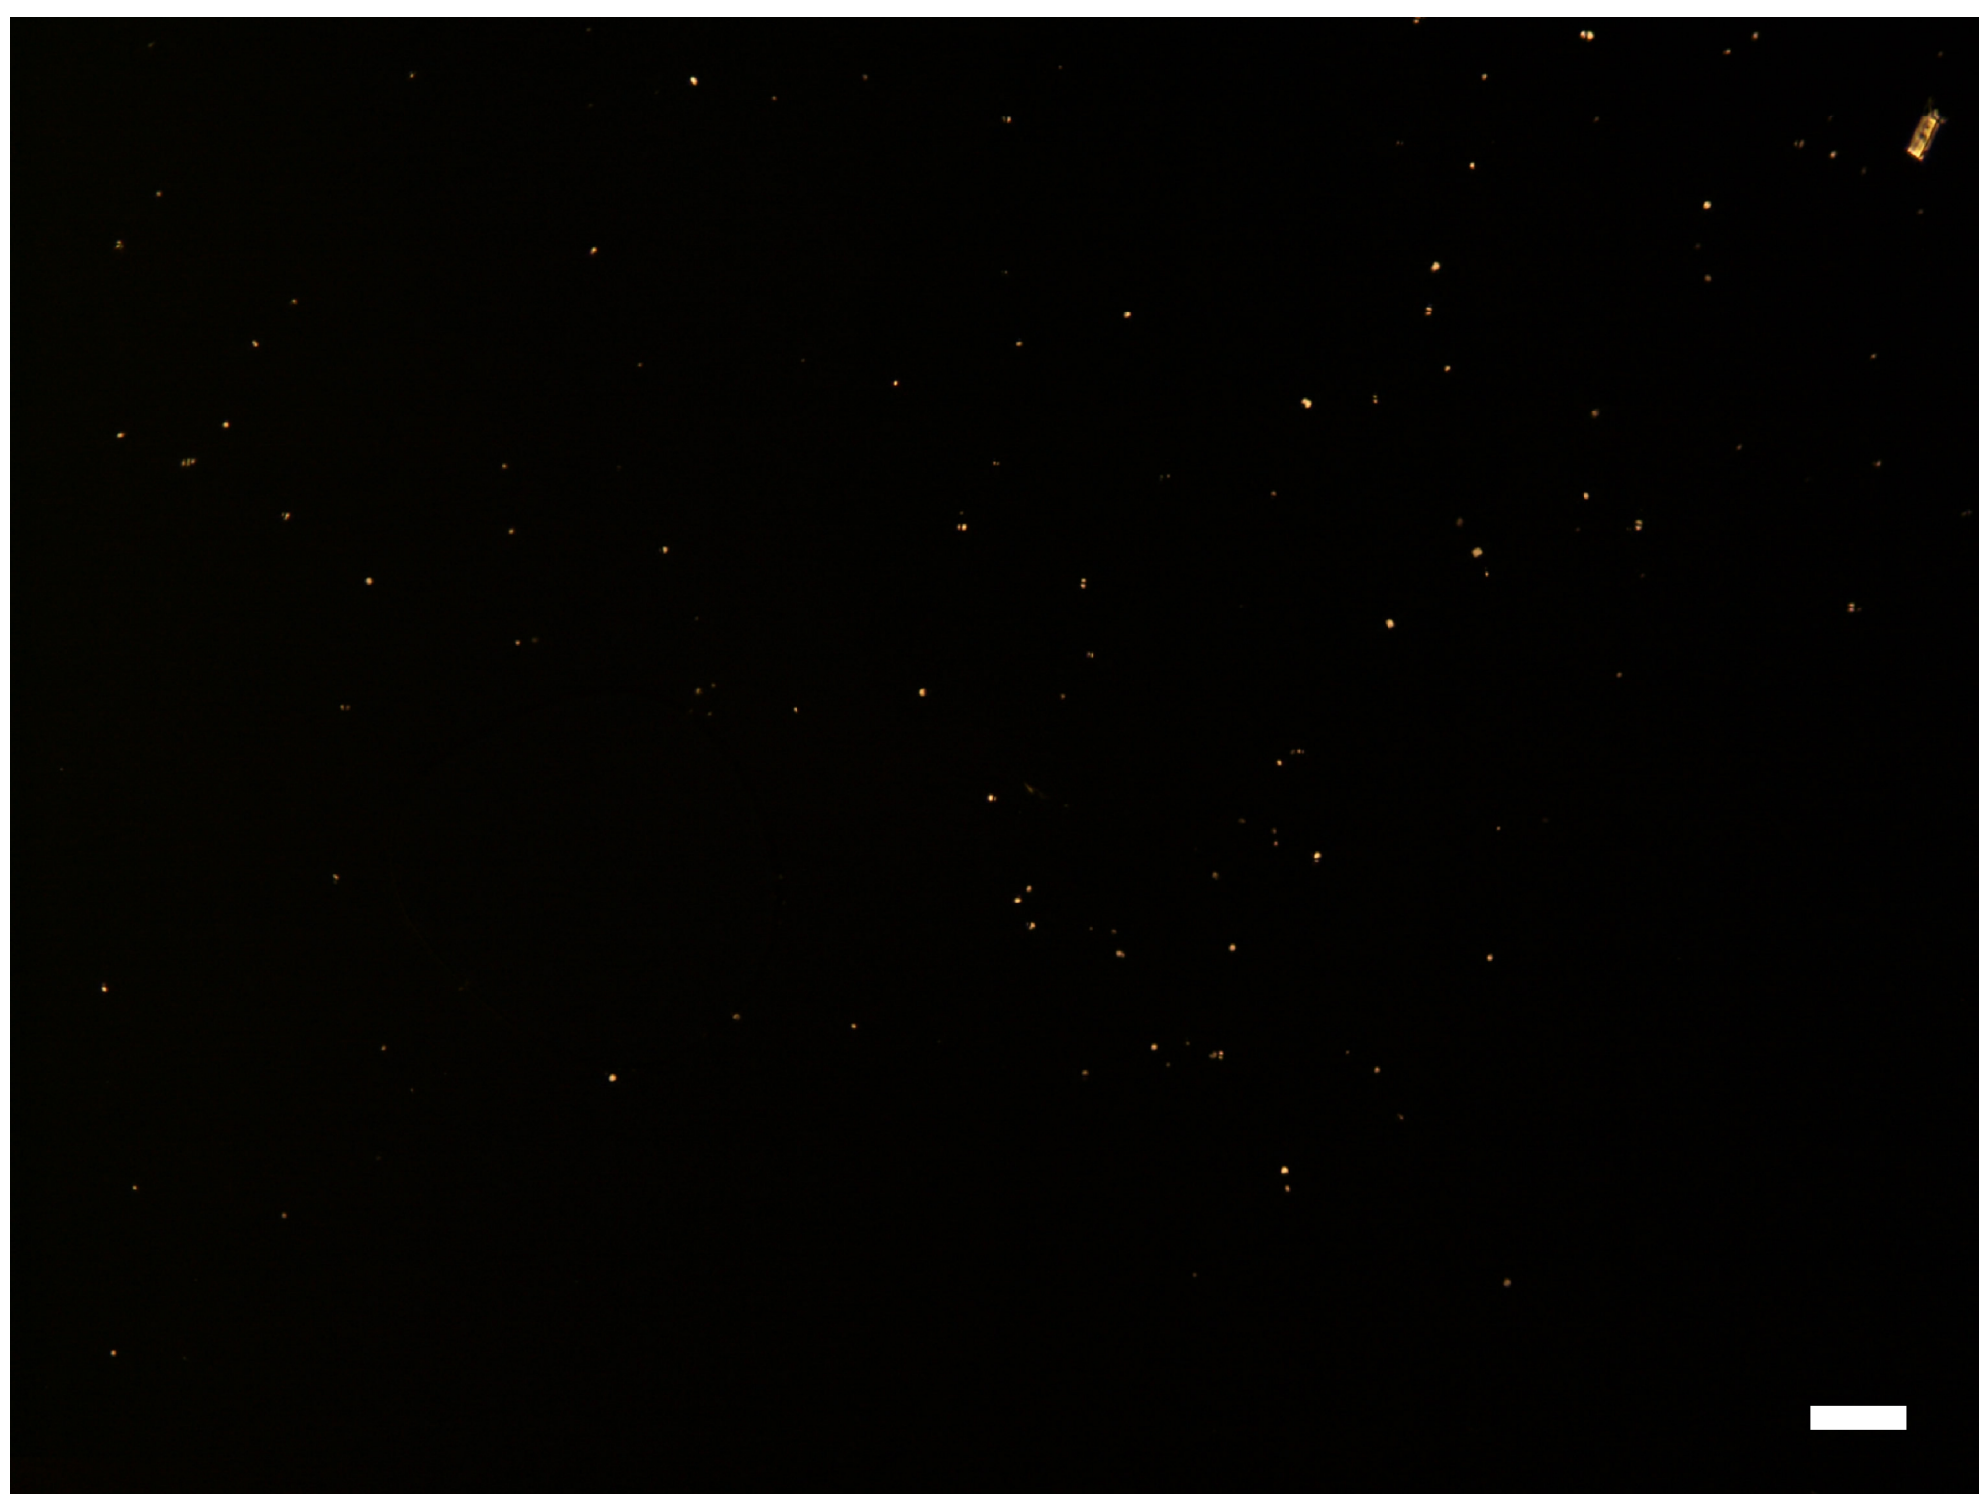

Supplement: pnas_0711319105_4.pdf [file pnas_0711319105_4.pdf]

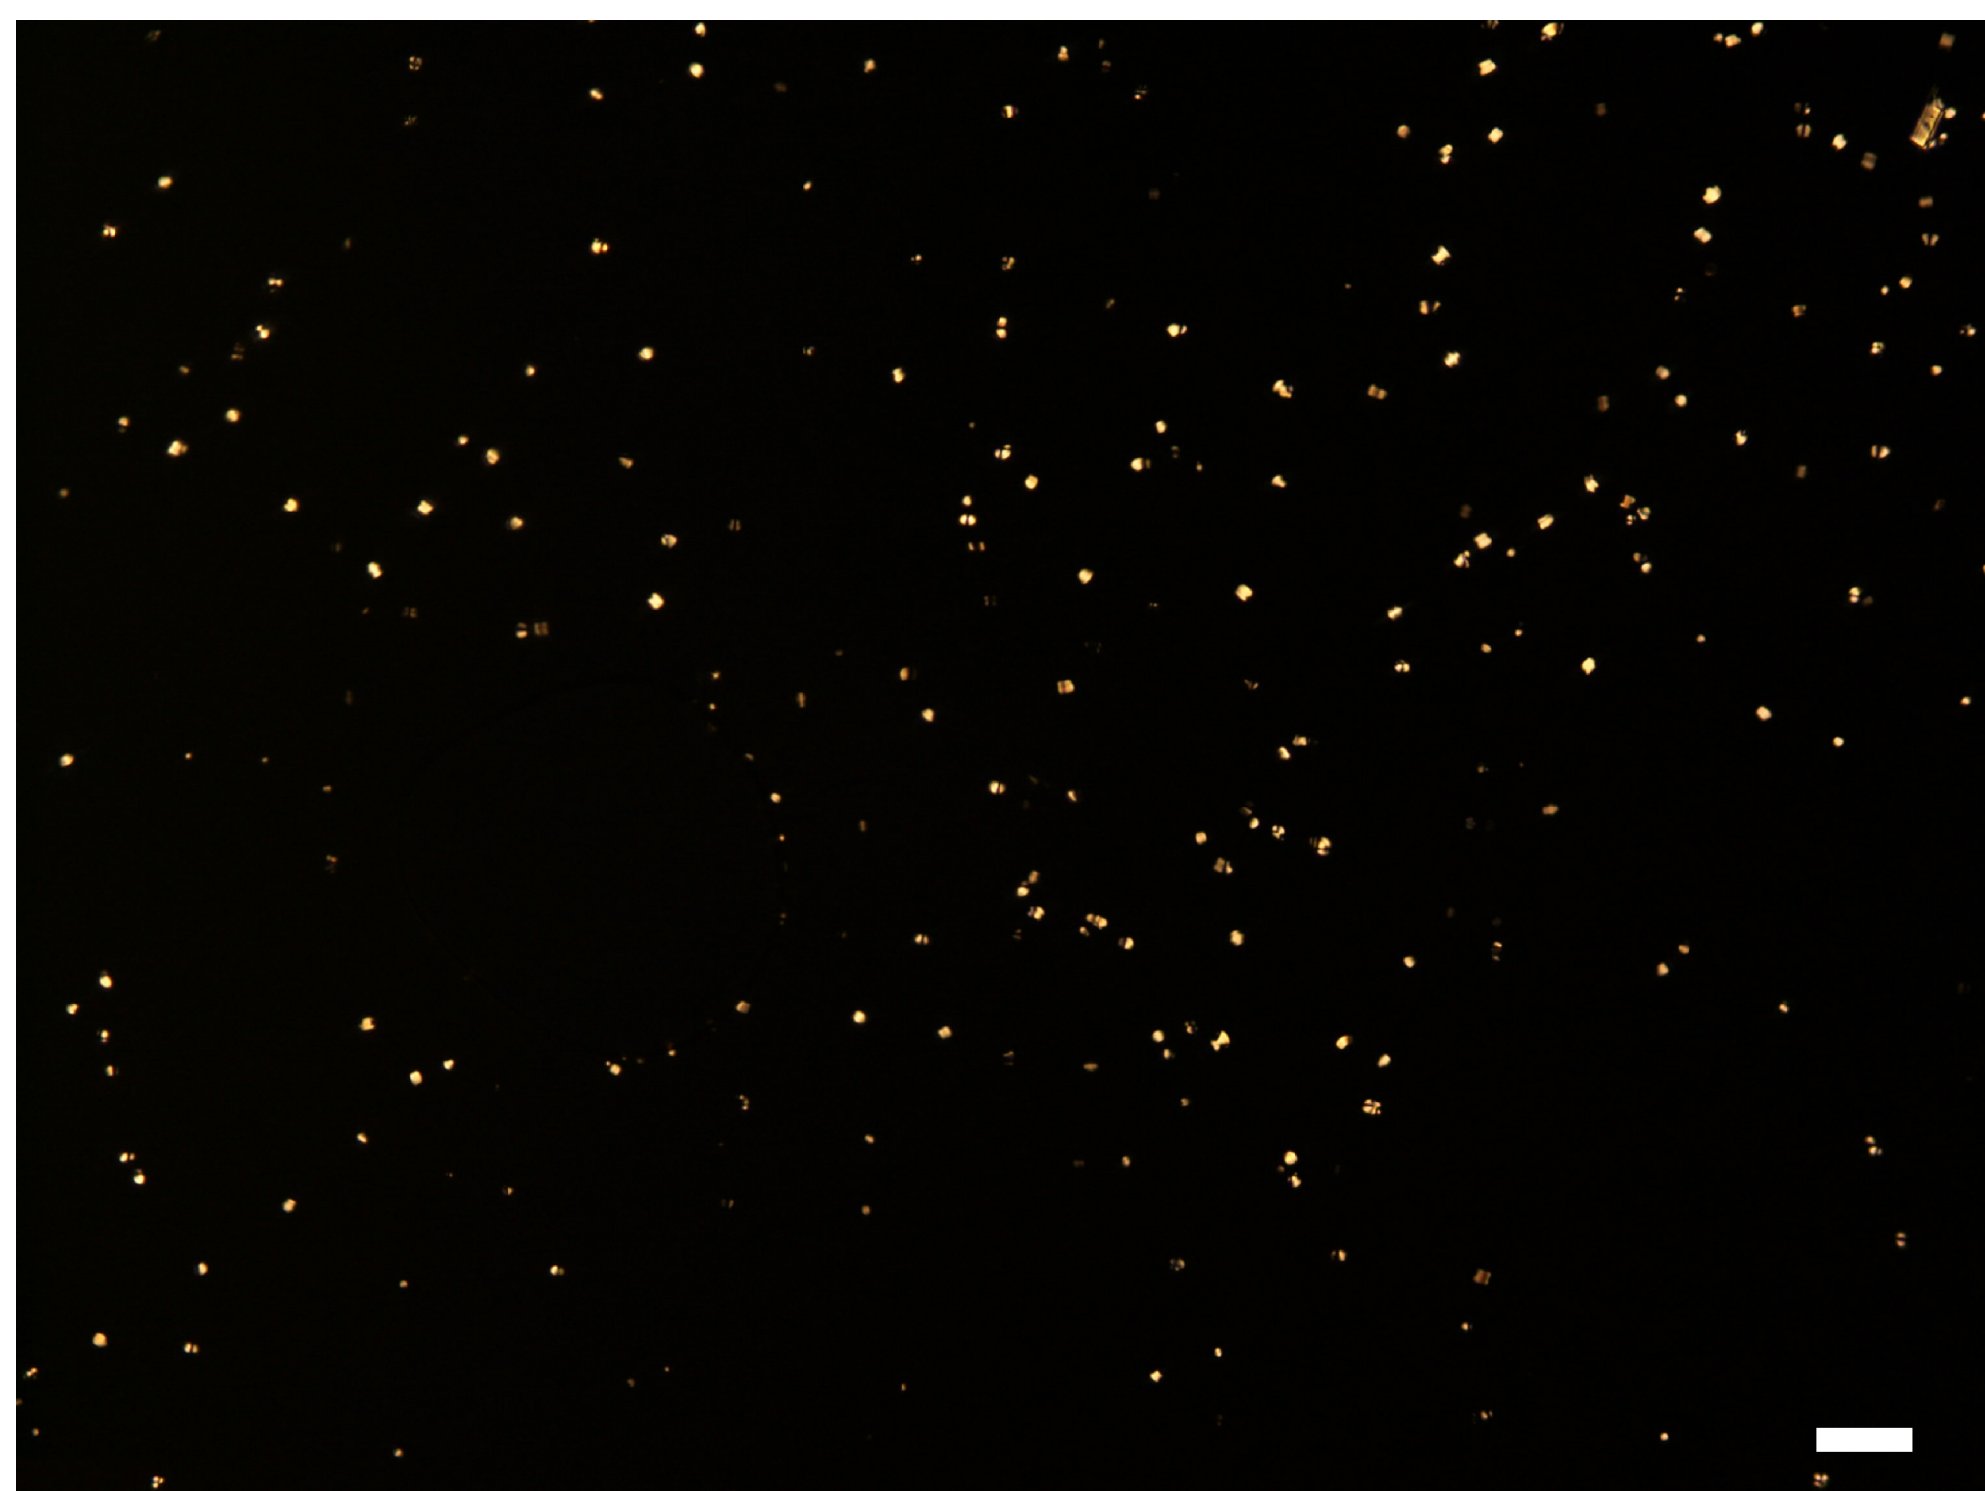

Supplement: pnas_0711319105_5.pdf [file pnas_0711319105_5.pdf]

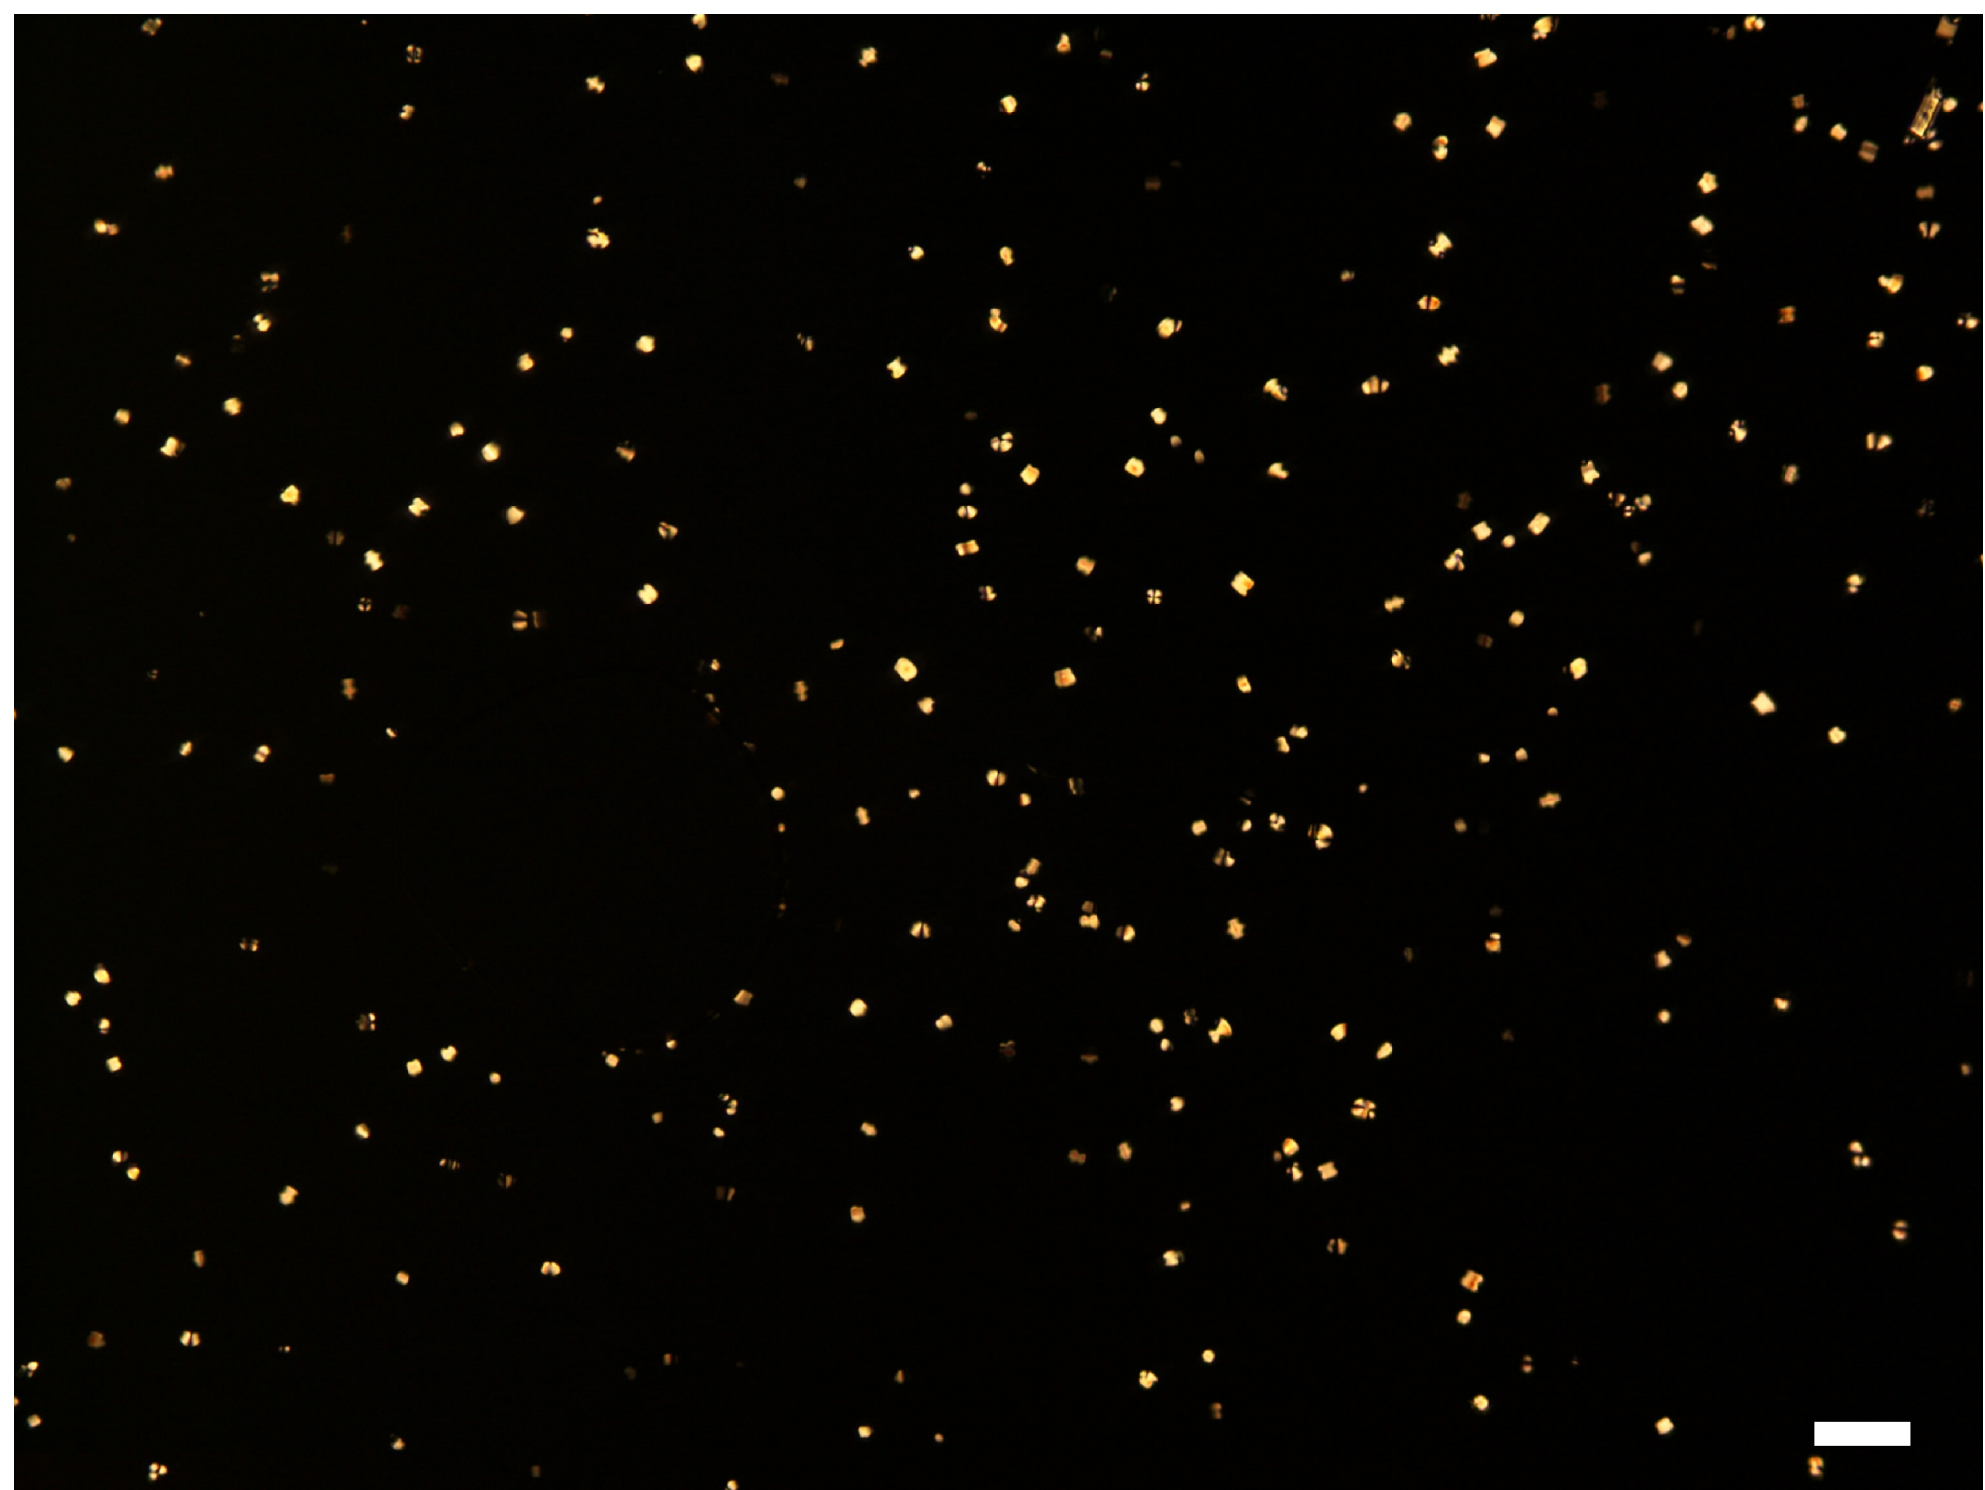

Supplement: pnas_0711319105_6.pdf [file pnas_0711319105_6.pdf]

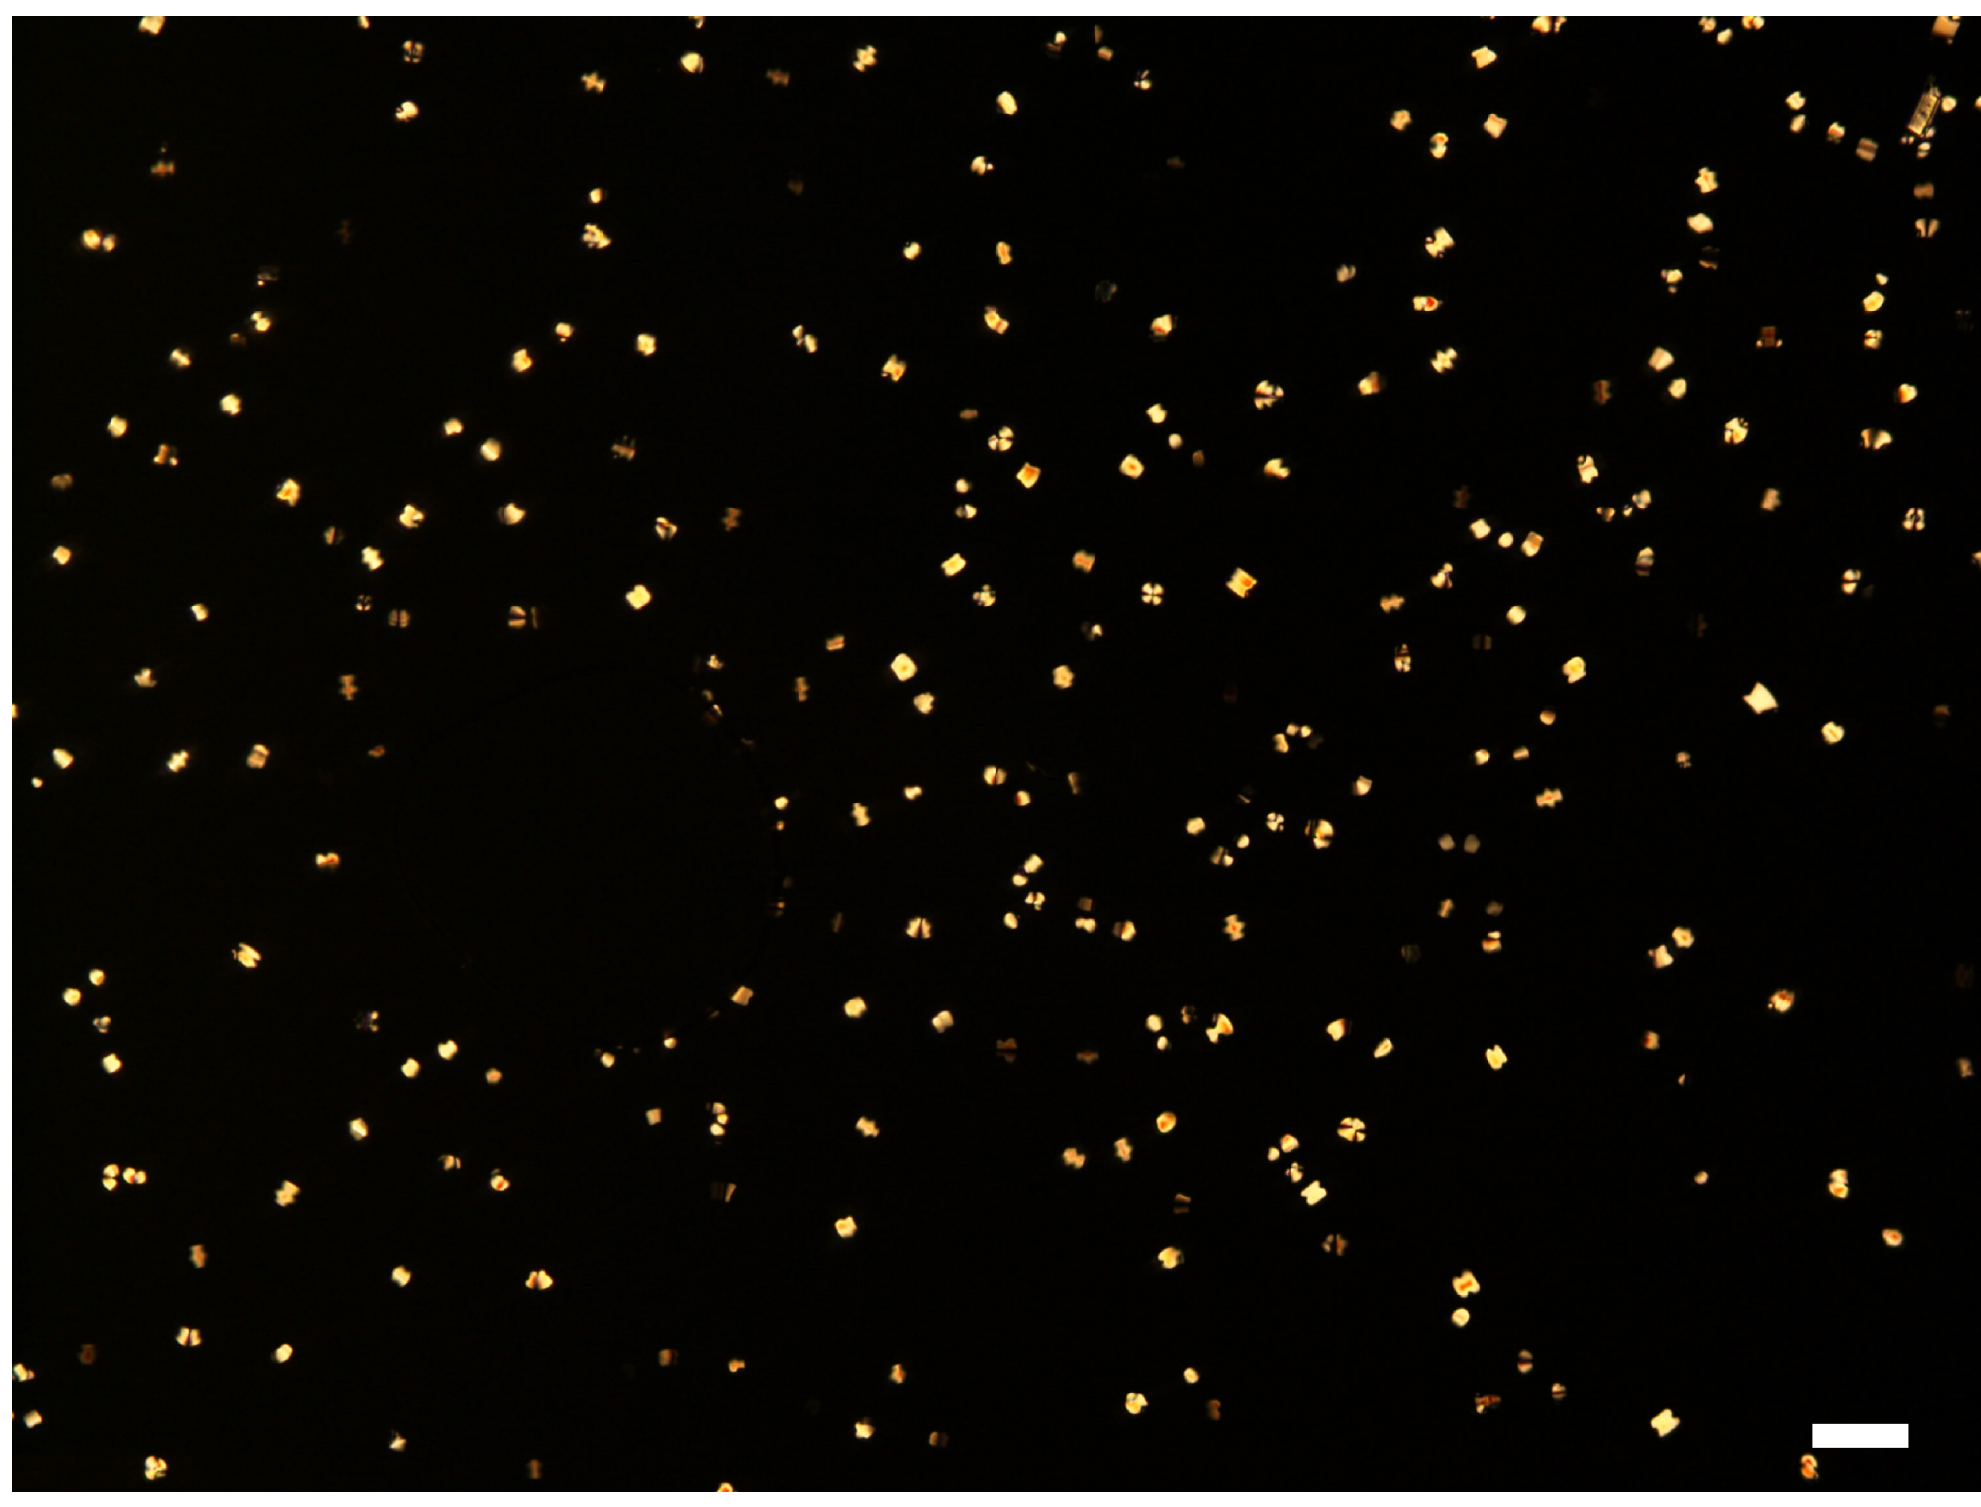

Supplement: pnas_0711319105_7.pdf [file pnas_0711319105_7.pdf]

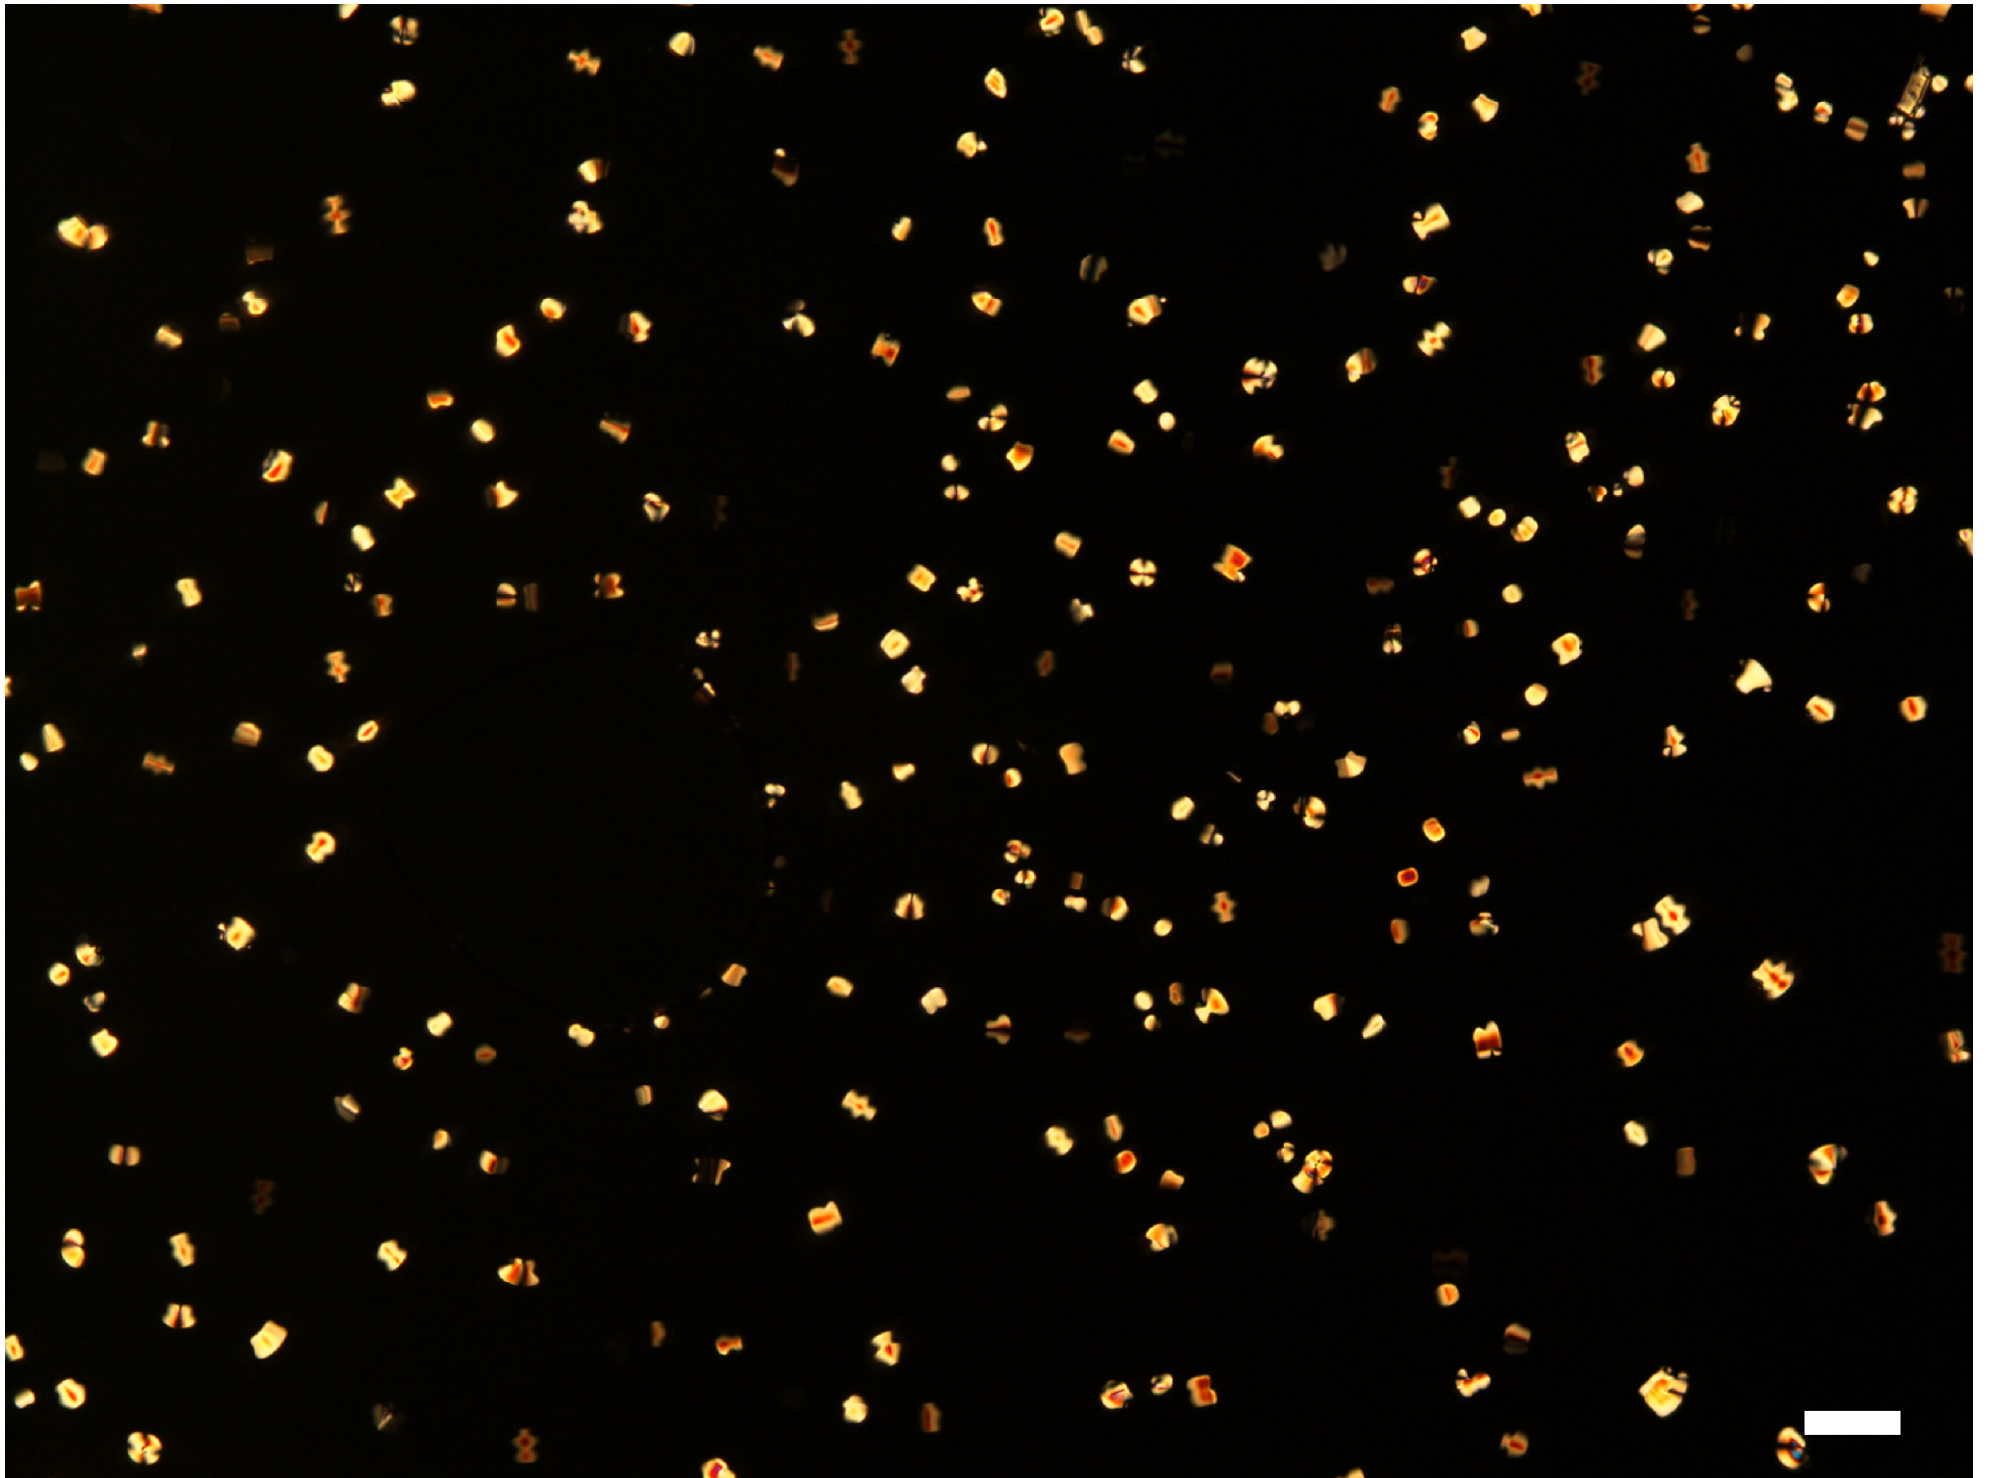

Supplement: pnas_0711319105_8.pdf [file pnas_0711319105_8.pdf]

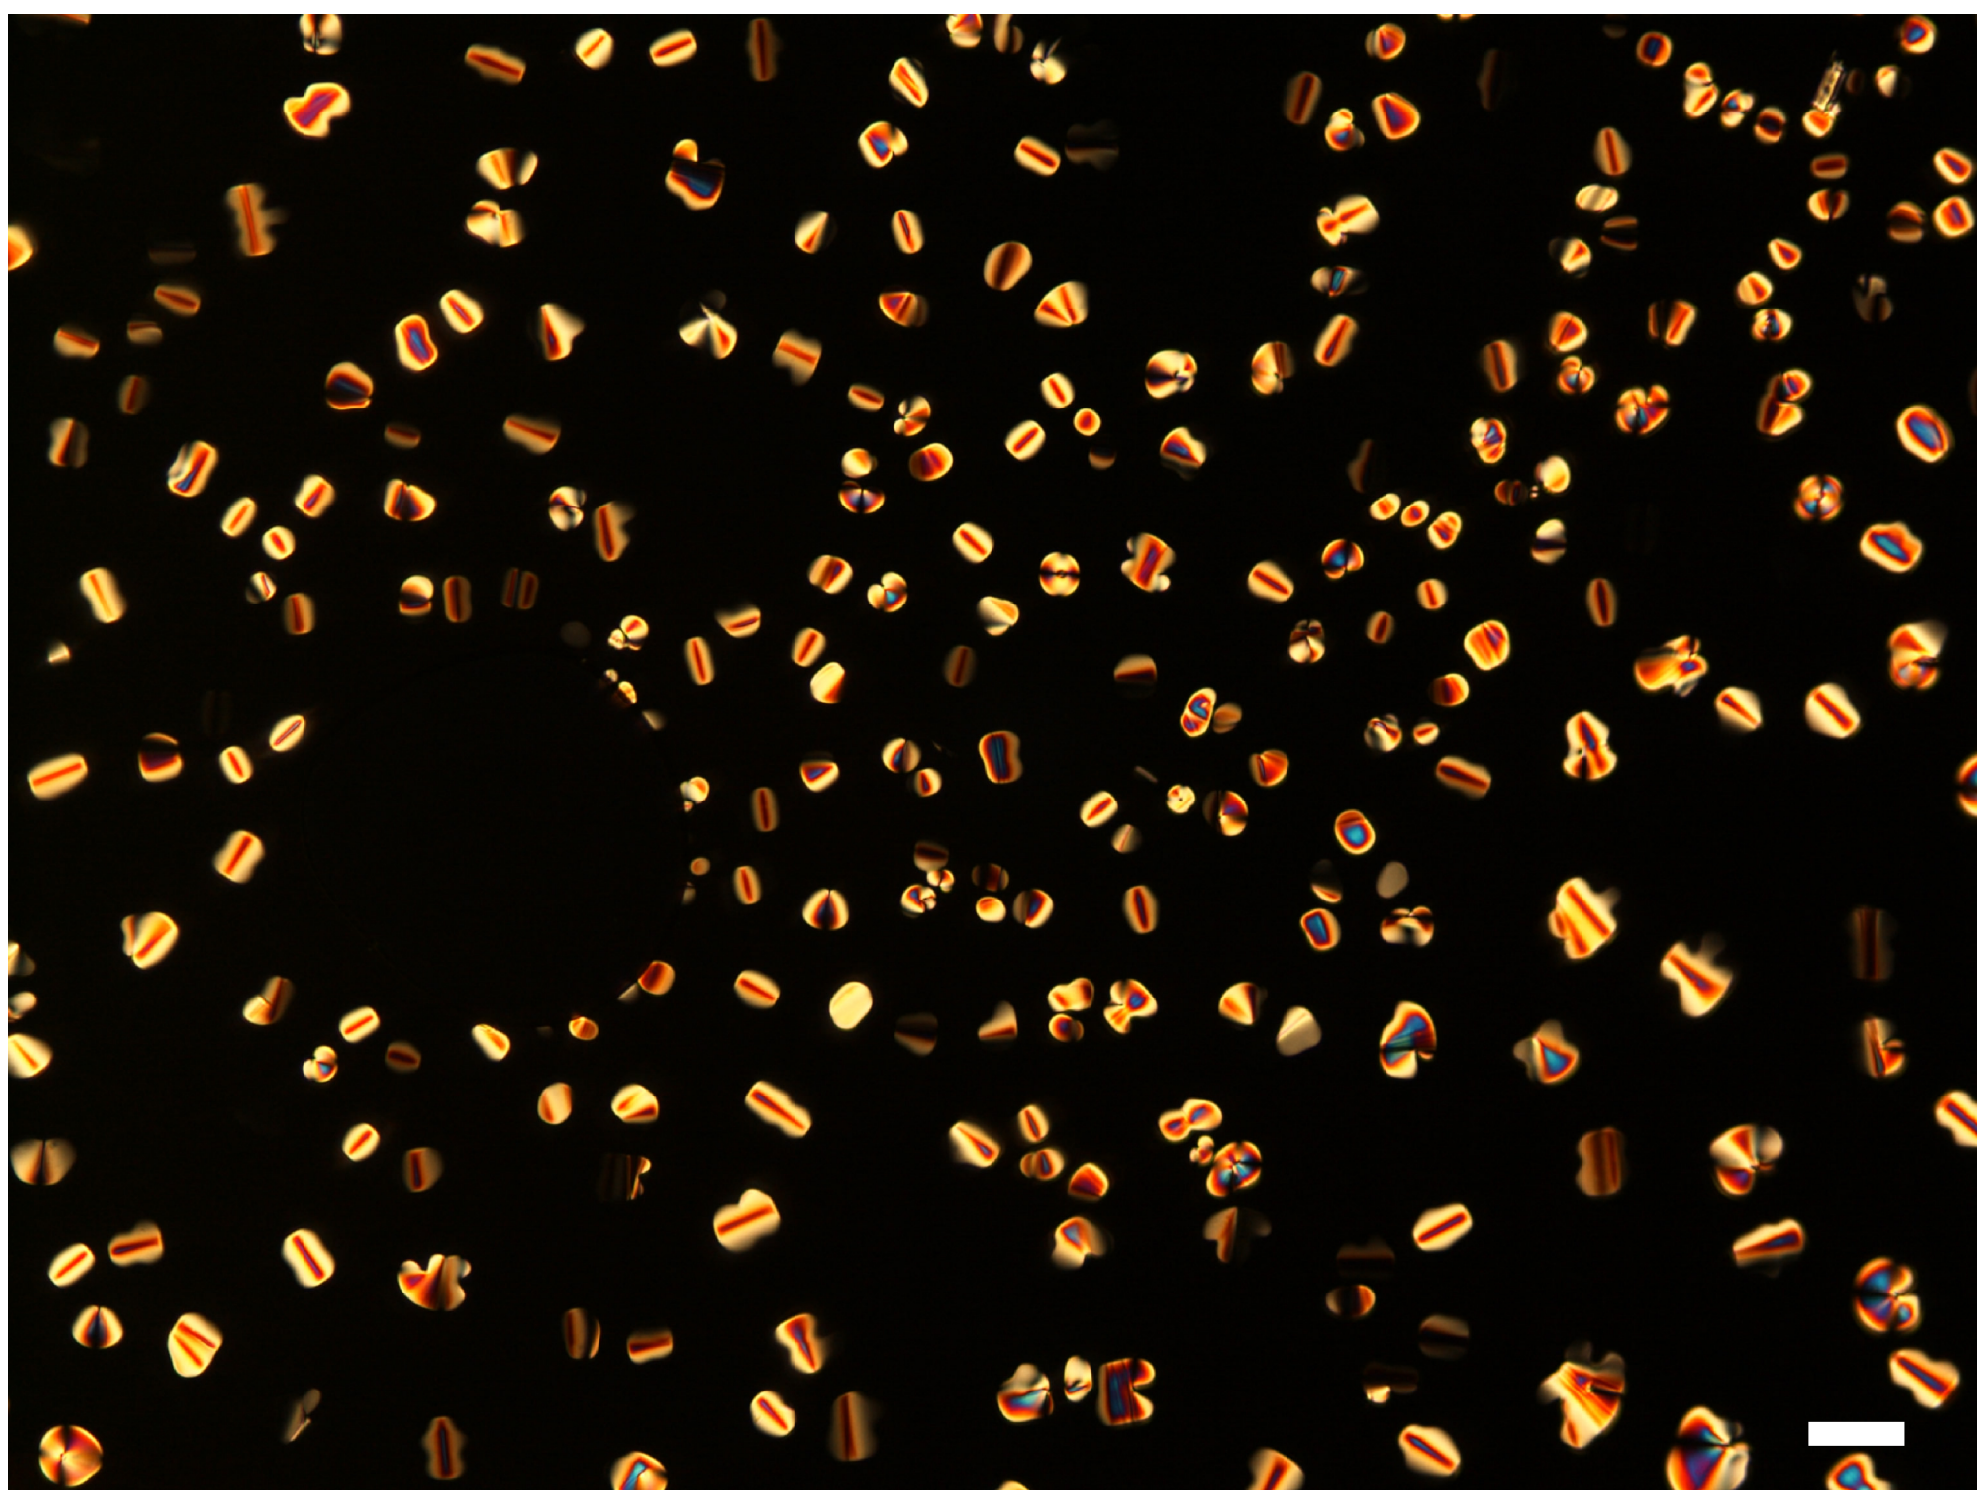

Supplement: pnas_0711319105_9.pdf [file pnas_0711319105_9.pdf]
